# Supplementary material
Source: publisher figshare collection journal article supplement (https://frontiersin.figshare.com/ndownloader/files/12358529)
Supplement: Supplementary file [file 12358529]

## *Supplementary Material*

### **Metabolic changes associated with muscle expression of SOD1<sup>G93A</sup>**

Gabriella Dobrowolny<sup>1,2,#,\*</sup>, Elisa Lepore<sup>1,2,#</sup>, Martina Martini<sup>1</sup>, Laura Barberi<sup>1</sup>, Abigail Nunn<sup>2</sup>, Bianca Maria Scicchitano<sup>3</sup>, Antonio Musarò<sup>1,2,\*</sup>

\* **Correspondence:** Correspondence: Antonio Musarò or Gabriella Dobrowolny, DAHFMO-Unit of Histology and Medical Embryology, Sapienza University of Rome, Via Scarpa 16 Rome 00161.

E-mail: [antonio.musaro@uniroma1.it](mailto:antonio.musaro@uniroma1.it); [gabriella.dobrowolny@uniroma1.it](mailto:gabriella.dobrowolny@uniroma1.it)

#### **1 Supplementary Figures and Tables**

##### **1.1 Supplementary Figures**

## Supplementary Figure 1.

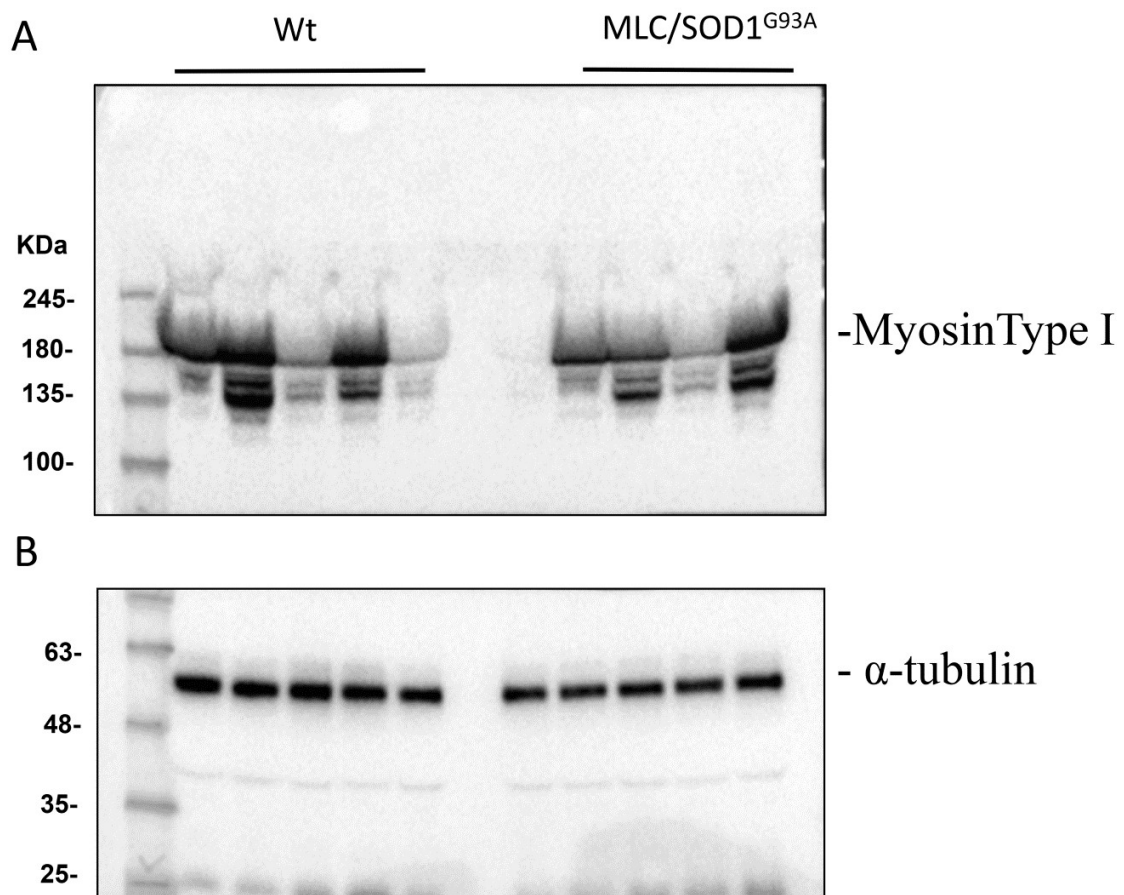

**SUPPLEMENTARY FIGURE 1.** Western blot analysis of (A) Myosin Type I and (B)  $\alpha$ -tubulin expression in wild type (Wt) and MLC/SOD1<sup>G93A</sup> transgenic mice;  $\alpha$ -tubulin is used as a control for protein loading. Correspondent cropped bands and densitometric analysis are show in Figure 1A.

**Supplementary Figure 2.**

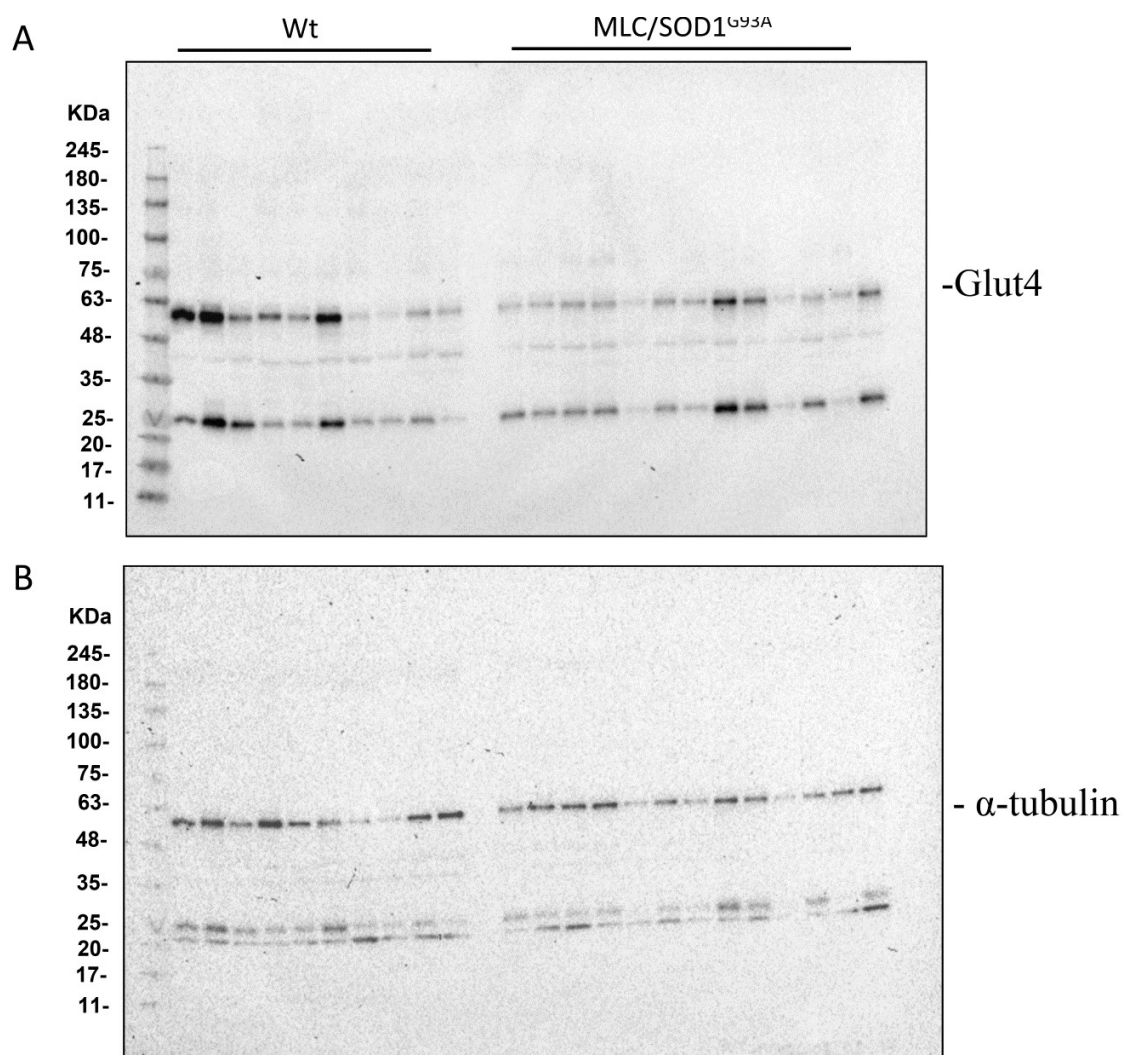

**SUPPLEMENTARY FIGURE 2.** Western blot analysis of (A) GLUT4 and (B)  $\alpha$ -tubulin expression in wild type (Wt) and MLC/SOD1<sup>G93A</sup> transgenic mice;  $\alpha$ -tubulin is used as a control for protein loading. Correspondent cropped bands and densitometric analysis are shown in Figure 2B.

## Supplementary Figure 3.

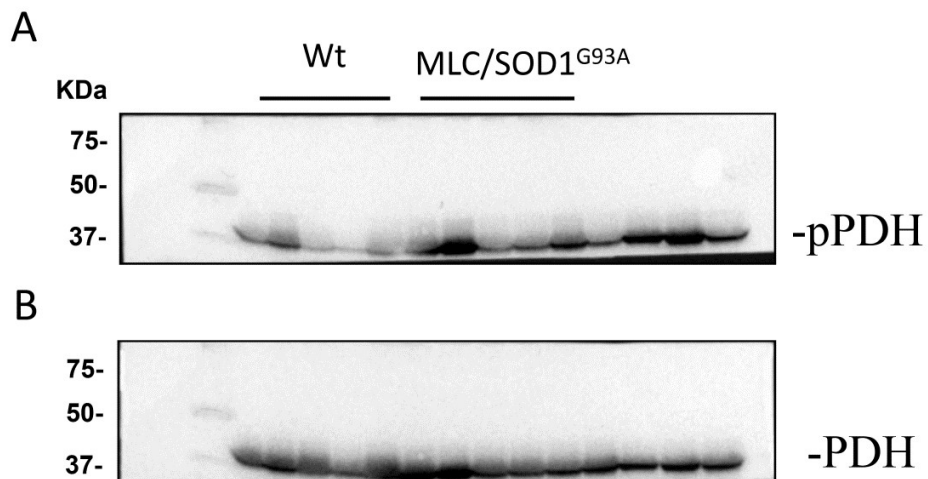

**SUPPLEMENTARY FIGURE 3.** Western blot analysis of (A) pPDH and (B) PDH expression in wild type (Wt) and MLC/SOD1<sup>G93A</sup> transgenic mice; Correspondent cropped bands and densitometric analysis are shown in Figure 2G.

# Supplementary Figure 4

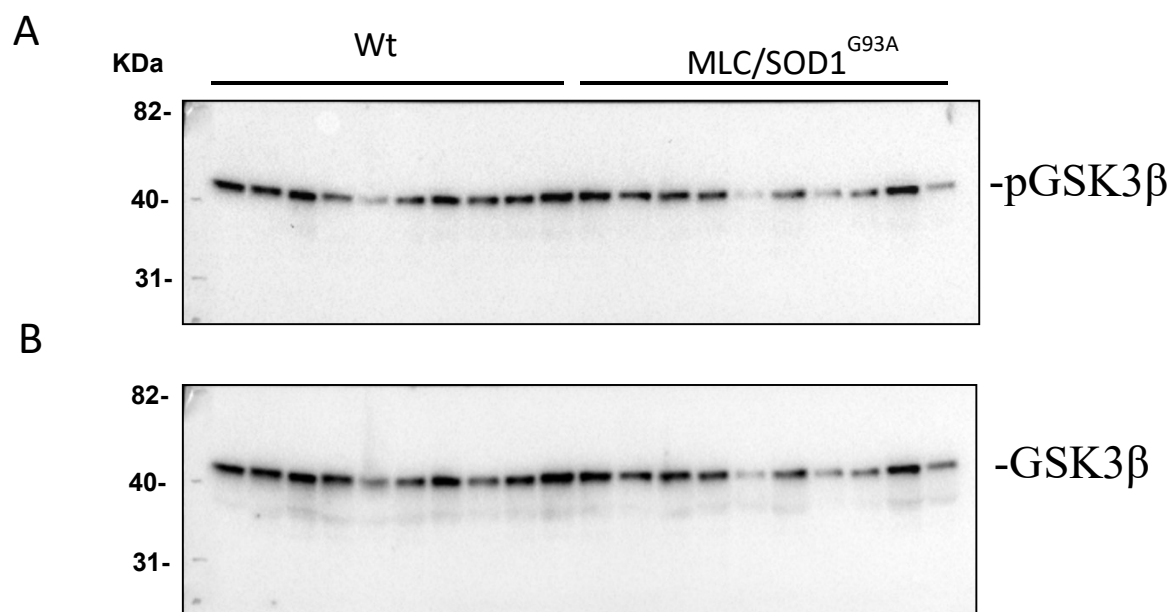

**SUPPLEMENTARY FIGURE 4.** Western blot analysis of (A) pGSK3 $\beta$  and (B) GSK3 $\beta$  expression in wild type (Wt) and MLC/SOD1<sup>G93A</sup> transgenic mice; Correspondent cropped bands and densitometric analysis are show in Figure 2H

## Supplementary Figure 5.

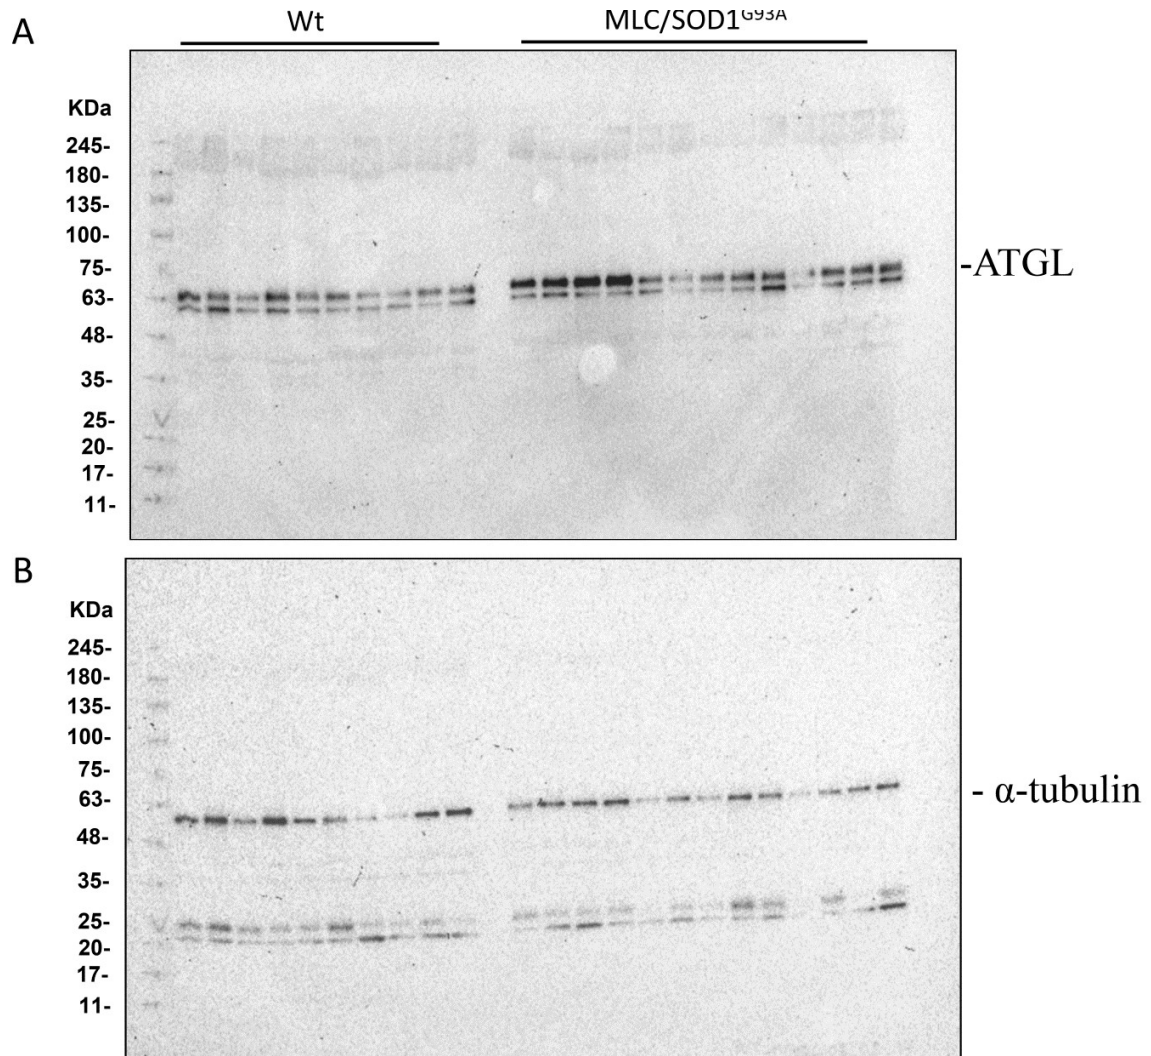

**SUPPLEMENTARY FIGURE 5.** Western blot analysis of (A) ATGL and (B)  $\alpha$ -tubulin expression in wild type (Wt) and MLC/SOD1<sup>G93A</sup> transgenic mice;  $\alpha$ -tubulin is used as a control for protein loading. Correspondent cropped bands and densitometric analysis are shown in Figure 3B.

**Supplementary Figure 6.**

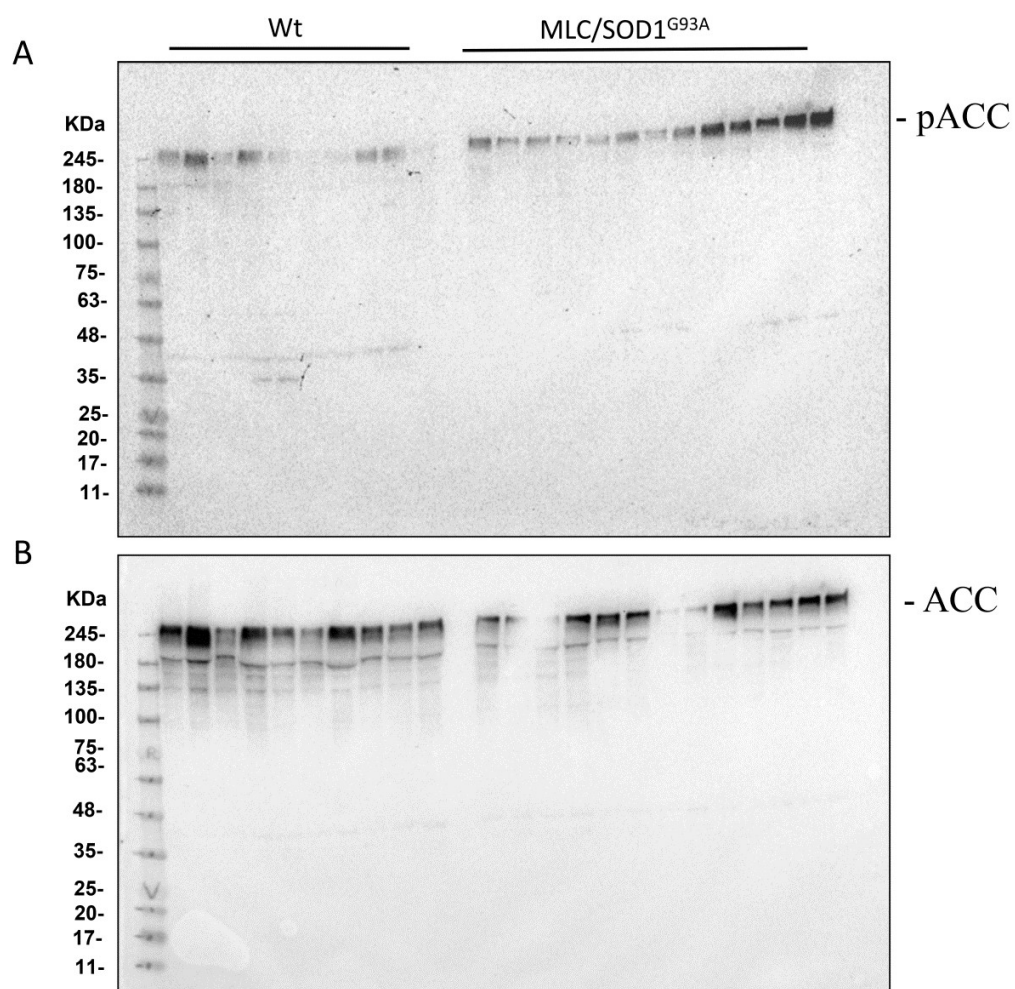

**SUPPLEMENTARY FIGURE 6.** Western blot analysis of (A) pACC and (B) ACC expression in wild type (Wt) and MLC/SOD1<sup>G93A</sup> transgenic mice. Correspondent cropped bands and densitometric analysis are show in Figure 3D.

## Supplementary Figure 7.

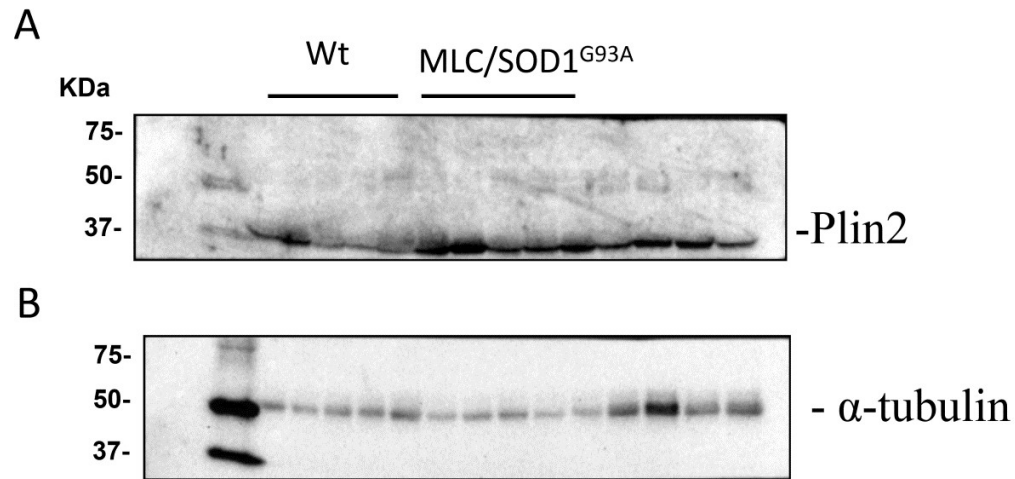

**SUPPLEMENTARY FIGURE 7.** Western blot analysis of (A) Plin2 and (B)  $\alpha$ -tubulin expression in wild type (Wt) and MLC/SOD1<sup>G93A</sup> transgenic mice;  $\alpha$ -tubulin is used as a control for protein loading. Correspondent cropped bands and densitometric analysis are shown in Figure 4C.
